# Supplementary material for: Agricultural Capacity to Increase the Production of Select Fruits and Vegetables in the US: A Geospatial Modeling Analysis
Source: Int J Environ Res Public Health. 2017 Sep 23;14(10):1106. doi: 10.3390/ijerph14101106 (PMC5664607; doi:10.3390/ijerph14101106)
Supplement: Supplementary file 1 [file ijerph-14-01106-s001.xlsx]

## Sheet: _xltb_storage_
XL Toolbox Settings
	export_preset	<?xml version="1.0" encoding="utf-16"?>_x000D_ <Preset xmlns:xsd="http://www.w3.org/2001/XMLSchema" xmlns:xsi="http://www.w3.org/2001/XMLSchema-instance">_x000D_ <Name>Emf</Name>_x000D_ <Dpi>300</Dpi>_x000D_ <FileType>Emf</FileType>_x000D_ <ColorSpace>Rgb</ColorSpace>_x000D_ <Transparency>TransparentCanvas</Transparency>_x000D_ <UseColorProfile>false</UseColorProfile>_x000D_ <ColorProfile>ProPhot…
	export_path	C:\Users\zach.conrad\Documents\Projects\Site suitability\Exhibits\Figure 3.emf

## Sheet: Supp. Table S1
Supplementary Table S1. Growing conditions for dates in Riverside County, California, by month.
Month		Maximum precipitation (mm)1		Minimum temperature (°C)2		Maximum temperature (°C)3		Notes4
May		45.24		−3.41		35.77		Minimum precipitation is not included because limited moisture is typically overcome with irrigation. Minimum soil depth is 0.91 meters. Acceptible soil texture classes are: sand, loamy sand, sandy loam, sandy clay loam, silty clay loam, sandy clay, clay, and clay loam.5
June		45.24		0.66		40.38
July		45.24		4.72		42.63
August		45.24		4.53		41.94
September		45.24		1.64		39.4
October		45.24		−2.5		33.76
1 Represents maximum precipitation in Riverside County, California in August (mean 1981–2010), when dates are most susceptible to damage from excessive moisture
2 Represents minimum temperature in Riverside County, California (mean 1981–2010)
3 Represents maximum temperature in Riverside County, California (mean 1981–2010)
4 Notes apply to all months
5 Proportion of sand, silt, and clay for each soil type was retrieved from: USDA NRCS. Soil Texture Calculator. Available online: http://www.nrcs.usda.gov/wps/portal/nrcs/detail/soils/survey/?cid=nrcs142p2_054167 (accessed on 13 June 2015)

## Sheet: Supp. Table S2
Supplementary Table S2. Growing conditions for kiwis in Tulare County, California, by month.
Month		Minimum temperature (°C)1		Maximum temperature (°C)2		Notes3
March		−15.11		20.78		Minimum precipitation is not incldued because limited moisture is typically overcome with irrigation. Maximum precipitation is not included because excessive moisture is uncommon. Minimum soil depth is 0.91 meters. Acceptible soil texture classes are: sandy loam and silt loam.4
April		−13.5		25.33
May		−8.96		30.17
June		−3.83		34.28
July		−0.3		37.84
August		−0.71		37.29
September		−3.61		34.28
October		−7.52		28.26
November		−11.71		19.7
1 Represents minimum temperature in Tulare County, California (mean 1981–2010)
2 Represents maximum temperature in Tulare County, California (mean 1981–2010)
3 Notes apply to all months
4 Proportion of sand, silt, and clay for each soil type was retrieved from: USDA NRCS. Soil Texture Calculator. Available online: http://www.nrcs.usda.gov/wps/portal/nrcs/detail/soils/survey/?cid=nrcs142p2_054167 (accessed on 13 June 2015)

## Sheet: Supp. Table S3
Supplementary Table S3. Growing conditions for kiwis in Butte County, California, by month.
Month		Minimum temperature (°C)1		Maximum temperature (°C)2		Notes3
March		−3.85		19.16		Minimum precipitation is not incldued because limited moisture is typically overcome with irrigation. Maximum precipitation is not included because excessive moisture is uncommon. Minimum soil depth is 0.91 meters. Acceptible soil texture classes are: sandy loam and silt loam.4
April		−2.34		23.2
May		1.16		27.85
June		4.48		32.67
July		7.85		36.87
August		7.15		36.61
September		5.2		33.38
October		0.82		27.26
November		−3.28		18.09
1 Represents minimum temperature in Butte County, California (mean 1981–2010)
2 Represents maximum temperature in Butte County, California (mean 1981–2010)
3 Notes apply to all months
4 Proportion of sand, silt, and clay for each soil type was retrieved from: USDA NRCS. Soil Texture Calculator. Available online: http://www.nrcs.usda.gov/wps/portal/nrcs/detail/soils/survey/?cid=nrcs142p2_054167 (accessed on 13 June 2015)

## Sheet: Supp. Table S4
Supplementary Table S4. Growing conditions for broccoli in Monterey County, California, by month.
Month		Minimum temperature (°C)1		Maximum temperature (°C)2		Notes3
January		−1.23		19.76		Minimum precipitation is not incldued because limited moisture is typically overcome with irrigation. Maximum precipitation is not included because excessive moisture is uncommon. Minimum soil depth is 0.61 meters. Can be grown in all types of soil.4
February		0.21		19.07
March		1.13		20.84
April		1.73		24.25
May		4.63		28.84
June		7.31		32.41
July		8.69		36.14
August		9.24		36.42
September		8.19		34.08
October		4.93		28.79
November		0.57		22.7
December		−1.43		19.08
1 Represents minimum temperature in Monterey County, California (mean 1981–2010)
2 Represents maximum temperature in Monterey County, California (mean 1981–2010)
3 Notes apply to all months
4 Proportion of sand, silt, and clay for each soil type was retrieved from: USDA NRCS. Soil Texture Calculator. Available online: http://www.nrcs.usda.gov/wps/portal/nrcs/detail/soils/survey/?cid=nrcs142p2_054167 (accessed on 13 June 2015)

## Sheet: Supp. Table S5
Supplementary Table S5. Growing conditions for broccoli in Santa Barbara County, California, by month.
Month		Minimum temperature (°C)1		Maximum temperature (°C)2		Notes3
January		−1.75		19.29		Minimum precipitation is not incldued because limited moisture is typically overcome with irrigation. Maximum precipitation is not included because excessive moisture is uncommon. Minimum soil depth is 0.61 meters. Can be grown in all types of soil.4
February		−1.06		19.37
March		0.11		20.7
April		1.23		24.04
May		4.62		27.57
June		7.73		32.46
July		10.29		36.12
August		10.5		35.96
September		8.09		32.48
October		4.36		28.27
November		0.98		22.34
December		−1.86		19.03
1 Represents minimum temperature in Santa Barbara County, California (mean 1981–2010)
2 Represents maximum temperature in Santa Barbara County, California (mean 1981–2010)
3 Notes apply to all months
4 Proportion of sand, silt, and clay for each soil type was retrieved from: USDA NRCS. Soil Texture Calculator. Available online: http://www.nrcs.usda.gov/wps/portal/nrcs/detail/soils/survey/?cid=nrcs142p2_054167 (accessed on 13 June 2015)

## Sheet: Supp. Table S6
Supplementary Table S6. Growing conditions for lima beans in Sussex and Kent Counties, Delaware, by month.
Month		Minimum temperature (°C)1		Maximum temperature (°C)2		Notes3
June		16.24		29.17		Minimum precipitation is not incldued because limited moisture is typically overcome with irrigation. Maximum precipitation is not included because excessive moisture is uncommon. Minimum soil depth is 0.30 meters. Can be grown in all types of soil.4
July		18.78		31.45
August		17.92		30.31
September		13.93		26.94
October		7.46		21.16
1 Represents minimum temperature in Sussex and Kent Counties, Delaware (mean 1981–2010)
2 Represents maximum temperature in Sussex and Kent Counties, Delaware (mean 1981–2010)
3 Notes apply to all months
4 Proportion of sand, silt, and clay for each soil type was retrieved from: USDA NRCS. Soil Texture Calculator. Available online: http://www.nrcs.usda.gov/wps/portal/nrcs/detail/soils/survey/?cid=nrcs142p2_054167 (accessed on 13 June 2015)

## Sheet: Supp. Table S7
Supplementary Table S7. Growing conditions for sweet potatoes in Johnston, Nash, Sampson, and Wilson Counties, North Carolina, by month.
Month		Minimum temperature (°C)1		Maximum temperature (°C)2		Notes3
June		17.66		31.06		Minimum precipitation is not incldued because limited moisture is typically overcome with irrigation. Maximum precipitation is not included because excessive moisture is uncommon. Minimum soil depth is 0.20 meters. Acceptible soil texture classes are: sand, loamy sand, and sandy loam.4
July		19.83		32.59
August		18.91		31.62
September		15.23		28.83
October		8.57		24.22
1 Represents minimum temperature in Johnston, Nash, Sampson, and Wilson Counties, North Carolina (mean 1981–2010)
2 Represents maximum temperature in Johnston, Nash, Sampson, and Wilson Counties, North Carolina (mean 1981–2010)
3 Notes apply to all months
4 Proportion of sand, silt, and clay for each soil type was retrieved from: USDA NRCS. Soil Texture Calculator. Available online: http://www.nrcs.usda.gov/wps/portal/nrcs/detail/soils/survey/?cid=nrcs142p2_054167 (accessed on 13 June 2015)

## Sheet: Supp. Table S8
Supplementary Table S8. Growing conditions for sweet potatoes in Calhoun County, Mississippi, by month.
Month		Minimum temperature (°C)1		Maximum temperature (°C)2		Notes3
June		18.52		30.97		Minimum precipitation is not incldued because limited moisture is typically overcome with irrigation. Maximum precipitation is not included because excessive moisture is uncommon. Minimum soil depth is 0.20 meters. Acceptible soil texture classes are: sand, loamy sand, and sandy loam.4
July		20.49		32.73
August		19.84		32.82
September		15.75		29.86
October		9.34		24.47
1 Represents minimum temperature in Calhoun County, Mississippi (mean 1981–2010)
2 Represents maximum temperature in Calhoun County, Mississippi (mean 1981–2010)
3 Notes apply to all months
4 Proportion of sand, silt, and clay for each soil type was retrieved from: USDA NRCS. Soil Texture Calculator. Available online: http://www.nrcs.usda.gov/wps/portal/nrcs/detail/soils/survey/?cid=nrcs142p2_054167 (accessed on 13 June 2015)

## Sheet: Supp. Table S9
Supplementary Table S9. Growing conditions for sweet potatoes in Merced County, California, by month.
Month		Minimum temperature (°C)1		Maximum temperature (°C)2		Notes3
June		13.64		32.57		Minimum precipitation is not incldued because limited moisture is typically overcome with irrigation. Maximum precipitation is not included because excessive moisture is uncommon. Minimum soil depth is 0.20 meters. Acceptible soil texture classes are: sand, loamy sand, and sandy loam.4
July		15.63		35.3
August		14.71		34.48
September		13.08		31.98
October		9.74		26.77
1 Represents minimum temperature in area of Merced County, California, in which 95% of the county's sweet potato land is cultivated (mean 1981–2010)
2 Represents maximum temperature in area of Merced County, California, in which 95% of the county's sweet potato land is cultivated (mean 1981–2010)
3 Notes apply to all months
4 Proportion of sand, silt, and clay for each soil type was retrieved from: USDA NRCS. Soil Texture Calculator. Available online: http://www.nrcs.usda.gov/wps/portal/nrcs/detail/soils/survey/?cid=nrcs142p2_054167 (accessed on 13 June 2015)

[truncated: 1 more sheets: Supp. Table S10]
